# Supplementary material for: Dual-ZIF-derived “reassembling strategy” to hollow MnCoS nanospheres for aqueous asymmetric supercapacitors
Source: Royal Society of Chemistry journal article supplement (doi:10.1039/d2ra03914a), 2022-01-01
Supplement: d2ra03914a1.pdf [file d2ra03914a1.pdf]

## Supporting Information

1. The specific capacitance ( $C_s$ , F g<sup>-1</sup>) from the GCD curves was calculated according the equation :

$$C_s = \frac{It}{m\Delta V} \quad (1)$$

where  $I$ ,  $t$ ,  $m$  and  $\Delta V$  are the discharge current (A) , the discharge time (s), the mass of the active substance (g) and the potential range (V), respectively.

2. The specific capacitance ( $C_s$ , F g<sup>-1</sup>) from the CV curves was calculated according the equation:

$$C_s = \frac{1}{mv(V_a - V_c)} \int_{V_a}^{V_c} I(V) dV \quad (2)$$

where  $I$ ,  $m$ ,  $v$ ,  $V_a$ ,  $V_c$  and  $\Delta V$  are the discharge current (A) , the mass of the active substance (g), the scan rate (V s<sup>-1</sup>), maximum voltage (V), minimum voltage (V) and the potential range (V), respectively.

3. The energy density ( $E$ , Wh Kg<sup>-1</sup>) and power density ( $P$ , W Kg<sup>-1</sup>) of the device were calculated basing on the equations below:

$$E = \frac{C_s \Delta V^2}{7200} \quad (3)$$

$$P = \frac{3600E}{t} \quad (4)$$

The  $C_s$  of the ASC was the achieved from the same equation of electrode except that the  $m$  contains the total mass of cathode and anode active materials.

**Fig. S1** SEM images of the (a) Cobalt-sulfur and (b) manganese-sulfur and XRD patterns of the (c) CS-5, (d) MS-5.

**Fig. S2** N<sub>2</sub> adsorption/desorption isotherms and pore size distributions of (a, b) MCS-1, (c, d) MCS-5, (e, f) MCS-10 and (g, h) MCS-15

**Fig. S3** (a) CV curves of MCS-1 electrode, (b) CV curves of MCS-10 electrode, (c) CV curves of MCS-15 electrode.

**Fig. S4** (a) GCD curves of MCS-1 electrode, (b) GCD curves of MCS-10 electrode, (c) GCD curves of MCS-15 electrode.

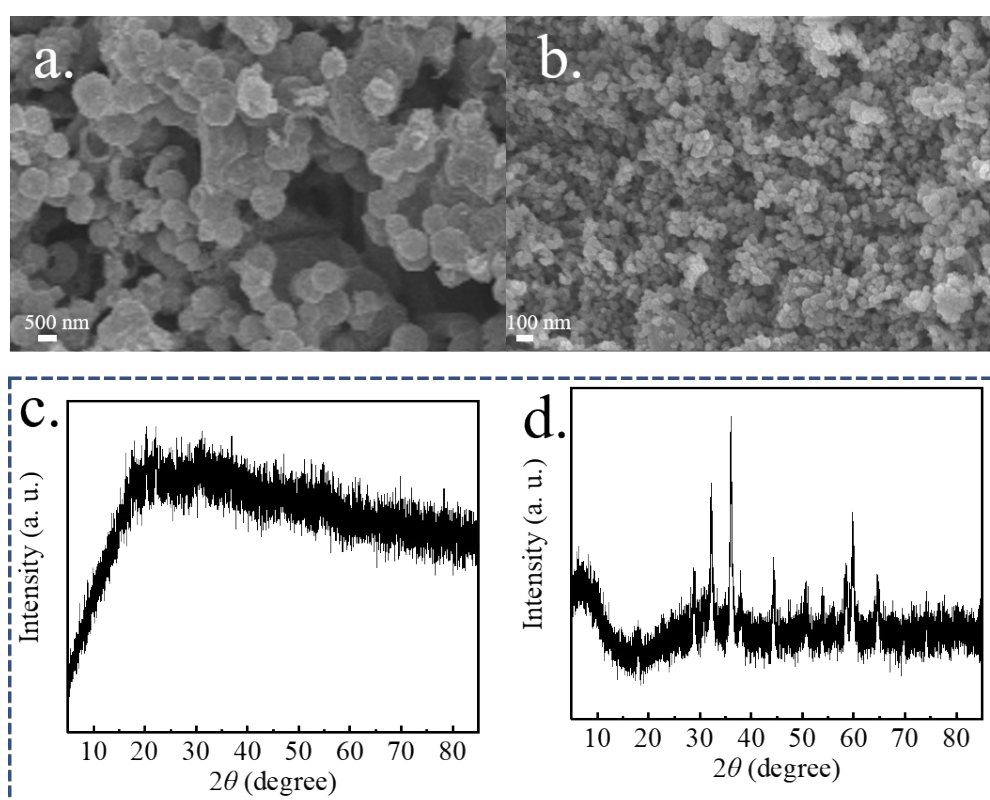

Fig. S1 SEM images of the (a) Cobalt-sulfur, (b) manganese-sulfur and (c)CS-5, (d) MS-5 XRD patterns.

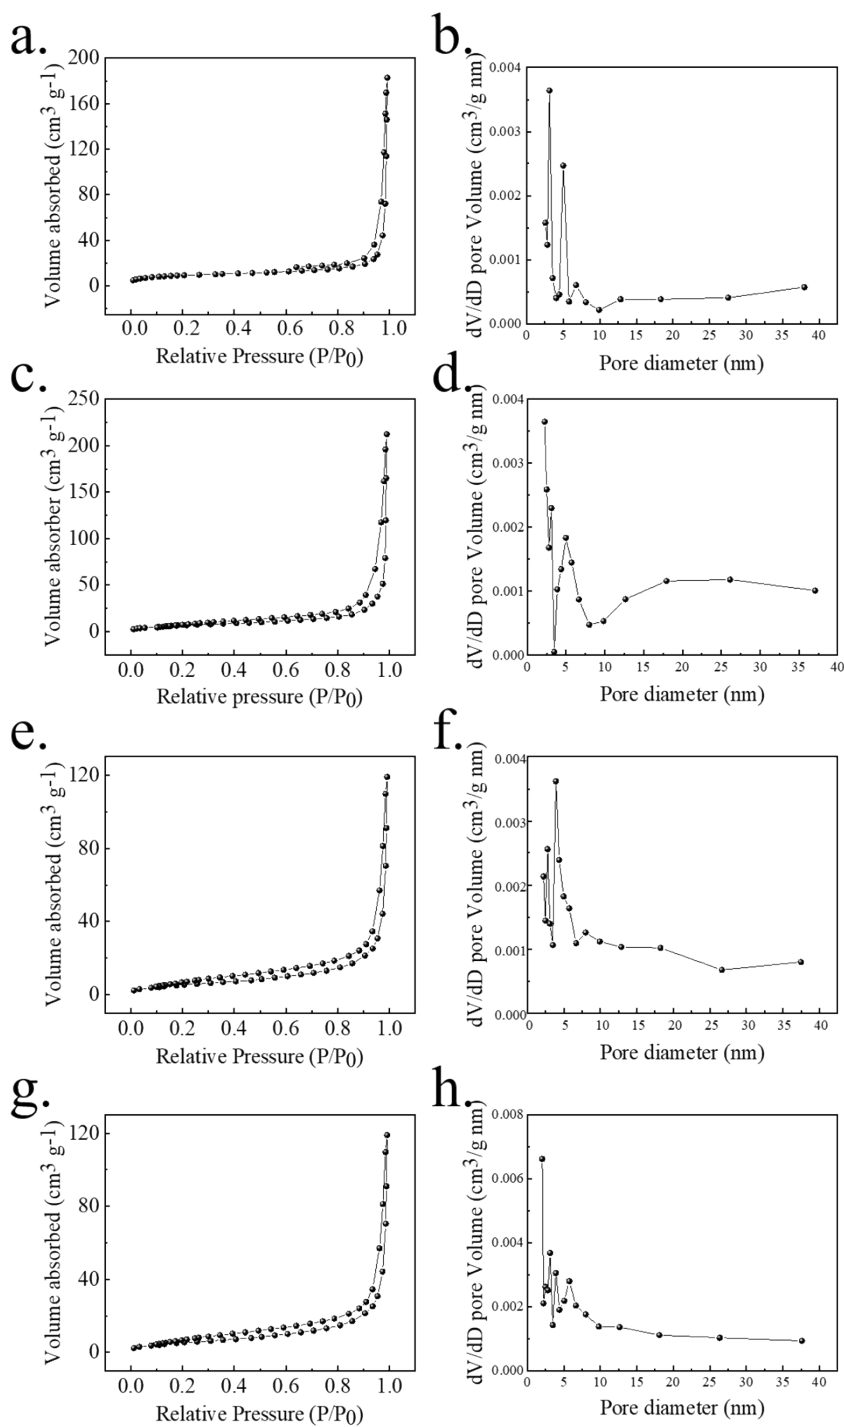

Fig. S2 N<sub>2</sub> adsorption/desorption isotherms and pore size distributions of (a, b) MCS-

1, (c, d) MCS-5, (e, f) MCS-10 and (g, h) MCS-15

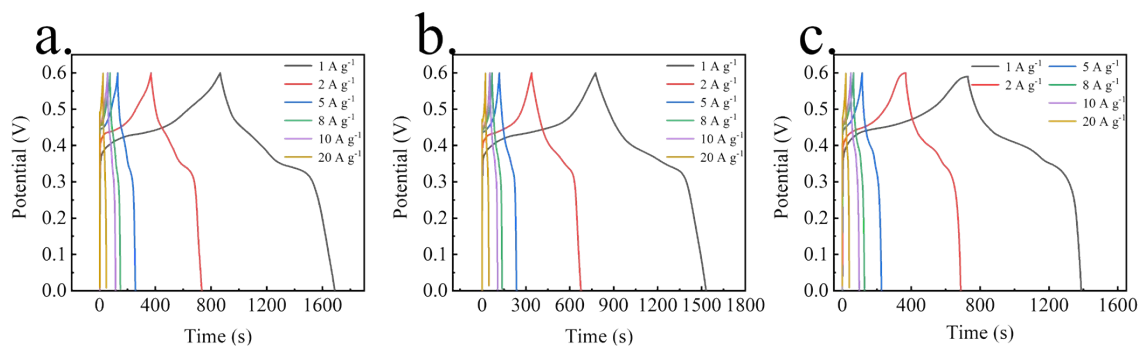

Fig. S3 (a) GCD curves of MCS-1 electrode, (b) GCD curves of MCS-10 electrode, (c) GCD curves of MCS-15 electrode

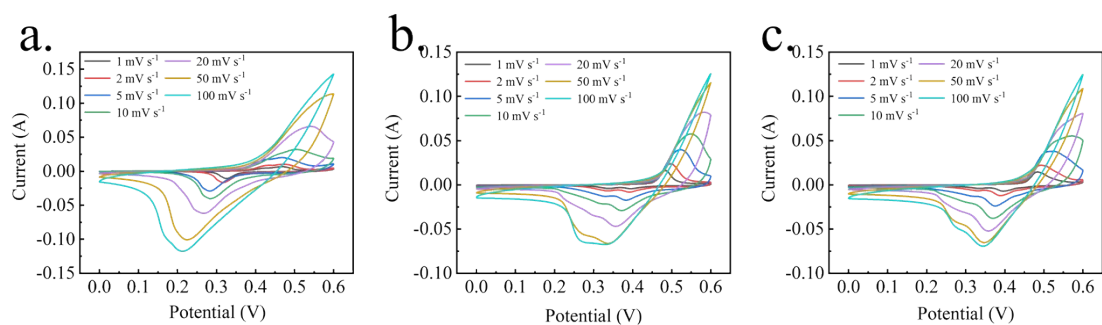

Fig. S4 (a) CV curves of MCS-1 electrode, (b) CV curves of MCS-10 electrode, (c) CV curves of MC-15 electrode.
